# Supplementary material
Source: MDPI journal article supplement (https://www.mdpi.com/2072-4292/15/10/2576)
Supplement: s1 [file s1]

**Table S1.** The results of the REP<sub>value</sub> model for predicting the LAI.

| Ratio | LAI model           | R <sup>2</sup> | RMSE |
|-------|---------------------|----------------|------|
| 1:1   | $y=0.255e^{352.9x}$ | 0.82**         | 0.54 |
| 2:1   | $y=0.272e^{346.8x}$ | 0.85**         | 0.49 |
| 3:1   | $y=0.348e^{307.2x}$ | 0.83**         | 0.48 |
| 4:1   | $y=0.361e^{304x}$   | 0.86**         | 0.48 |
| 9:1   | $y=0.349e^{308.4x}$ | 0.86**         | 0.45 |

Note: Ratio represents the number of ratio for calibration and validation data sets.

**Table S2.** The results of the MSR model for predicting the LNA.

Note: Ratio represents the number of ratio for calibration and validation data sets.

| Ratio | LNA model          | R <sup>2</sup> | RMSE(kg/ha) |
|-------|--------------------|----------------|-------------|
| 1:1   | $y=3.488e^{0.64x}$ | 0.85**         | 10.71       |
| 2:1   | $y=4.67e^{0.58x}$  | 0.90**         | 8.30        |
| 3:1   | $y=4.32e^{0.59x}$  | 0.86**         | 10.46       |
| 4:1   | $y=4.36e^{0.59x}$  | 0.87**         | 10.07       |
| 9:1   | $y=4.37e^{0.59x}$  | 0.87**         | 10.65       |
